# Supplementary material for: Superoxide increases angiotensin II AT1 receptor function in human kidney‐2 cells
Source: PubMed Central journal article supplement (PMC5302058; doi:10.1002/2211-5463.12148), 2016-11-16
Supplement: FEB4-6-1273-s001.pdf [file FEB4-6-1273-s001.pdf]

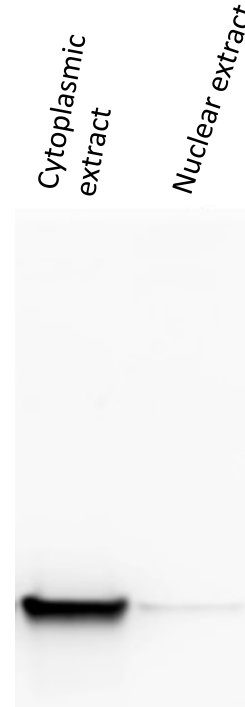

Supplemental Figure 1: Nuclear fraction is devoid of cytoplasmic contamination: Adherent HK2 cells were harvested with trypsin EDTA, washed in PBS and pelleted. Nuclear and cytoplasmic extracts were separated by a kit based method (Thermo Fisher Scientific, Catalog # 78835) following manufacturer's instructions as described in Methods. Purity of the fractions was assessed by western blotting of GAPDH. Representative blot of GAPDH in cytoplasmic and nuclear fractions.
